# Supplementary material for: A Comprehensive Step-by-Step Guide to Using Data Science Tools in the Gestion of Epidemiological and Climatological Data in Rice Production Systems
Source: MDPI journal article supplement (doi:10.3390/agronomy13112844), 2023-11-19
Supplement: s1 [file s1]

# A Comprehensive Step-by-Step Guide to Using Data Science Tools in the Gestion of Epidemiological and Climatological Data in Rice Production Systems

## Supplementary Materials

**Table S1.** Diseases evaluated in the monitoring of SP sensor plots and their causal agents.

| Disease                           | Causal agent                                                          | Phenological stage of evaluation* |   |   |   |   |   |   | Variables evaluated  |           |          |
|-----------------------------------|-----------------------------------------------------------------------|-----------------------------------|---|---|---|---|---|---|----------------------|-----------|----------|
|                                   |                                                                       | 2                                 | 3 | 4 | 5 | 6 | 7 | 8 | Presence and absence | Incidence | Severity |
| Rice Stripe Necrosis Virus (RSNV) | Plasmodio Vector ( <i>Polymyxa graminis</i> )                         | X                                 | X | X | X | X |   |   | X                    | X         |          |
| Rice Hoja Blanca (RHBV)           | Tenuivirus. Insecto Vector ( <i>Tagosodes orizicolus</i> )            | X                                 | X | X | X | X |   |   | X                    | X         |          |
| Leaf Blast (BI)                   | <i>Magnaporthe oryzae</i> (=Pyricularia oryzae)                       | X                                 | X |   |   |   |   |   | X                    | X         | X        |
| Brown Spot (BS)                   | <i>Cochliobolus miyabeanus</i> (=Bipolaris oryzae; Drechslera oryzae) | X                                 | X | X | X | X | X | X |                      | X         | X        |
| Sheath Blight (ShB)               | <i>Rhizoctonia solani</i>                                             | X                                 | X | X | X | X | X | X |                      | X         | X        |
| Narrow Brown Leaf Spot (NBLs)     | <i>Sphaerulina oryzina</i> (=Cercospora sp.)                          | X                                 | X | X | X | X |   |   | X                    | X         | X        |
| Leaf Scald (Ls)                   | <i>Monographella albescens</i> (=Microdochium oryzae;                 | X                                 | X | X | X | X |   |   | X                    | X         | X        |

|                        |                                                                                                                                           |   |   |   |   |   |   |   |   |
|------------------------|-------------------------------------------------------------------------------------------------------------------------------------------|---|---|---|---|---|---|---|---|
|                        | <i>Sin. Gerlachia-Rhynchosporim)</i>                                                                                                      |   |   |   |   |   |   |   |   |
| Rice Sheat Rot (ShR)   | <i>Sarocladium oryzae</i> ;<br><i>Fusarium spp.</i> ;<br><i>Pseudomonas spp.</i>                                                          | X | X | X | X | X | X | X | X |
| Crown sheath rot (CSR) | <i>Gaeumannomyces graminis</i> ;<br><i>Sin Ophiobolus sp.</i>                                                                             | X | X | X | X | X | X | X | X |
| Panicle Blast (PB)     | <i>Magnaporthe oryzae</i><br>(=Pyricularia oryzae)                                                                                        |   |   | X | X | X |   | X |   |
| Ear Blight (EB)        | <i>Bipolaris oryzae</i> ;<br><i>Cercospora oryzae</i> ;<br><i>Curvularia lunata</i> ;<br><i>Fusarium spp</i> ;<br><i>Cladosporium spp</i> |   |   | X | X | X |   | X |   |
| Bacterial Blight (BB)  | <i>Pseudomonas fuscovaginae</i> ;<br><i>Burkholderia glumae</i> ;<br><i>Burkholderia gladioli</i>                                         |   |   | X | X | X |   | X |   |
| Rice vane syndrome     | <i>Several factors, among them</i><br><i>Burkholderia glumae</i> ;<br><i>Burkholderia gladioli</i>                                        |   |   | X | X |   |   |   | X |

Phenology: 2) sowing to emergence; 3) seedling to the start of tillering; 4) maximum tillering to start of floral primordium; 5) start of floral primordium to start of budding; 6) maximum clogging to start of flowering; 7) flowering with doughy grain; and (8) harvest

**Table S2.** Diseases evaluated in the sampling of phytosanitary brigades BF and their causal agents.

| Disease                | Causal agent                                                                                | Variables evaluated  |           |          |
|------------------------|---------------------------------------------------------------------------------------------|----------------------|-----------|----------|
|                        |                                                                                             | Presence and absence | Incidence | Severity |
| Brown Spot (BS)        | <i>Cochliobolus miyabeanus</i> (=Bipolaris oryzae; Drechslera oryzae)                       | X                    | X         |          |
| Sheath Blight (ShB)    | <i>Rhizoctonia solani</i>                                                                   | X                    | X         |          |
| Rice Sheat Rot (ShR)   | <i>Sarocladium oryzae</i> ; <i>Fusarium</i> spp.; <i>Pseudomonas</i> spp.                   | X                    | X         | X        |
| Crown sheath rot (CSR) | <i>Gaeumannomyces graminis</i> ; <i>Sin Ophiobolus</i> sp.                                  | X                    | X         |          |
| Panicle Blast (PB)     | <i>Magnaporthe oryzae</i> (=Pyricularia oryzae)                                             | X                    | X         |          |
| Bacterial Blight (BB)  | <i>Pseudomonas fuscovaginae</i> ; <i>Burkholderia glumae</i> ; <i>Burkholderia gladioli</i> | X                    | X         |          |
| Mite                   | <i>Steneotarsonemus spinki</i>                                                              | X                    | X         |          |
| Borer                  | <i>Diatraea saccharalis</i>                                                                 | X                    | X         |          |
| Rice vane syndrome     | Varios factores, entre ellos <i>Burkholderia glumae</i> ; <i>Burkholderia gladioli</i>      |                      |           | X        |

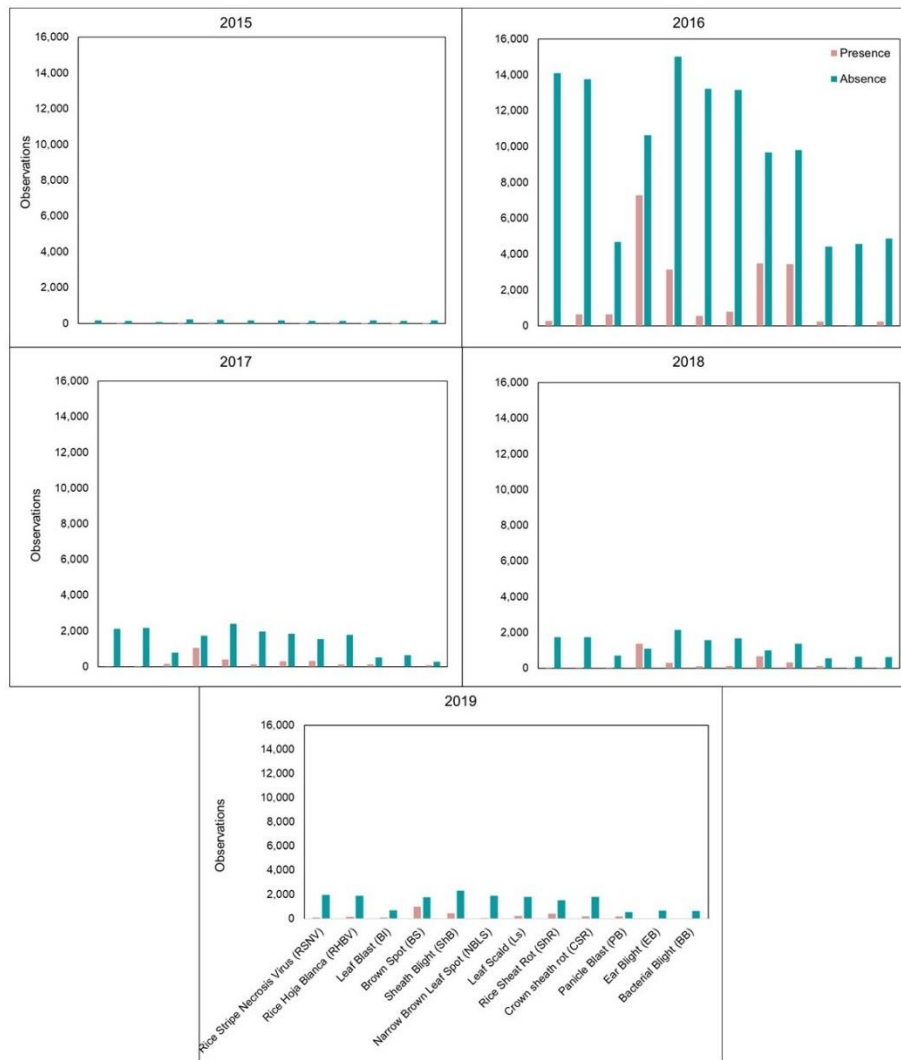

**Figure S1.** Quantification of the intensity variable of presence and absence due to disease in rice in Colombia based on observations made per year in the sampling of sensor plots (SP).



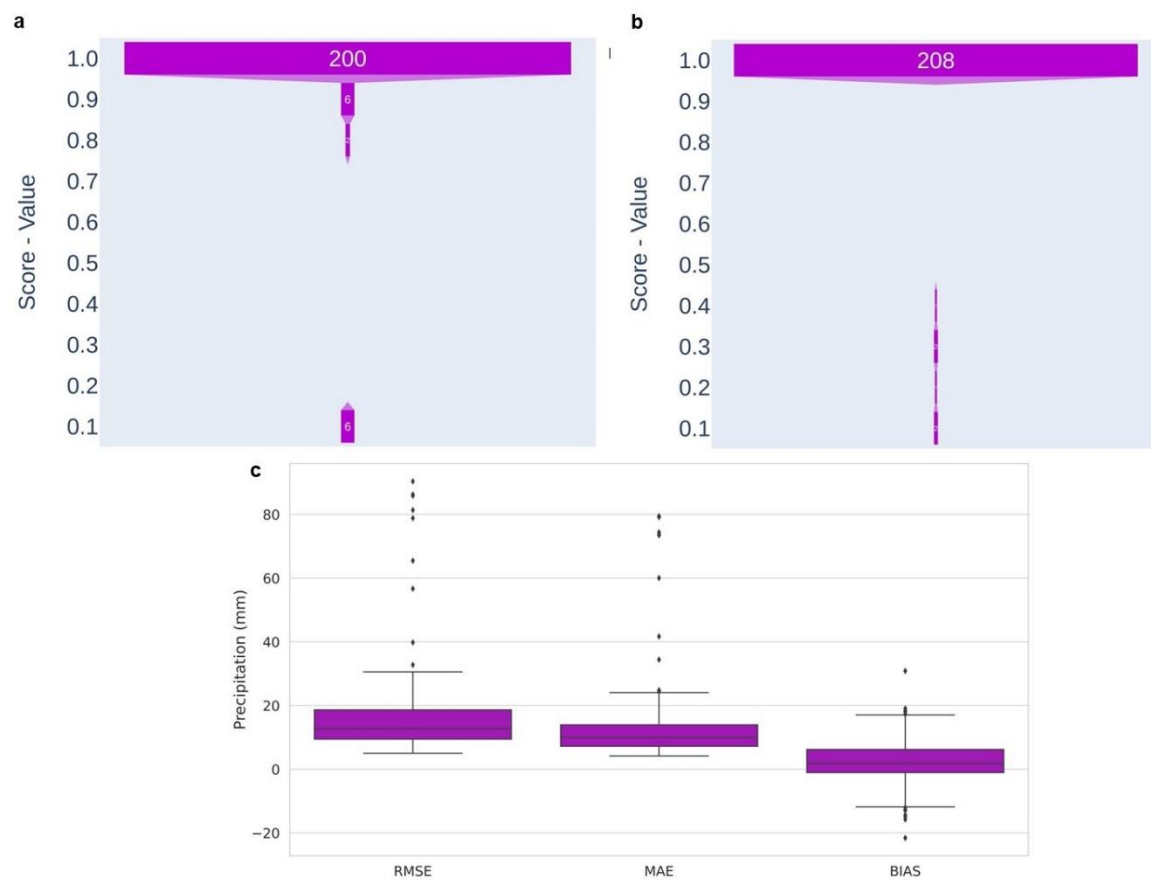

**Figure S3.** Frequency of *in situ* stations by: (a) value of the coefficient of determination  $R^2$ ; (b) by Pearson correlation ( $r$ ); and (c) boxplot with calculated values of error metrics RMSE, MAE, BIAS, obtained from the comparison of the climatological normals of the IDEAM for 1917-2000 and 1981 -2010 for the variable PCPT.

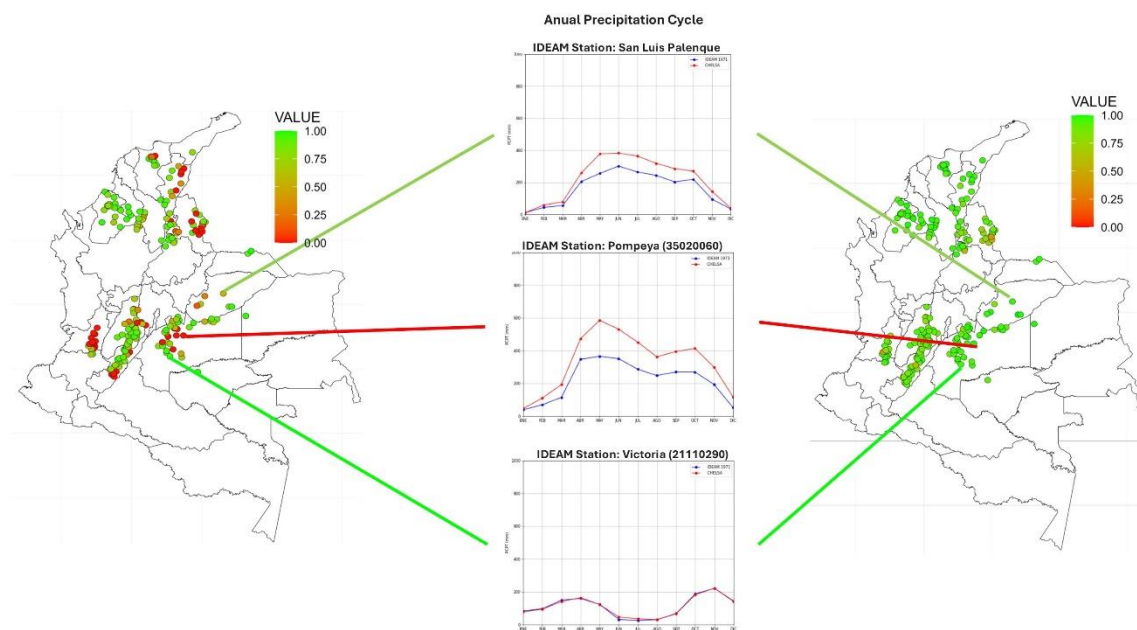

**Figure S4.** Spatial distribution of  $R^2$  (left) and Pearson coefficient ( $r$ ) (right) together with climatologies of the multiannual monthly PCPT observed by IDEAM (blue lines) and estimated by CHLSA (red lines) from 3 representative stations. From top to bottom, the San Luis de Palenque station (Casanare department) with a value of  $R^2 = 0.57$  and  $r = 0.99$ ; Pompeya Station (Meta department) with  $R^2 = -0.23$  and  $r = 0.99$ ; and La Victoria Station (Huila department) with  $R^2 = 0.99$  and  $r = 1.00$ .

**Table S3.** Principal Components Analysis

Eigenvectors

| Variables      | e1       | e2    |
|----------------|----------|-------|
| etp_sumatoria  | -0.11    | -0.04 |
| prcp_sumatoria | -0.39    | -0.37 |
| tmax_mediana   | 0.46     | -0.11 |
| tmin_mediana   | 0.34     | -0.41 |
| tas_mediana    | 0.46     | -0.22 |
| hr_mediana     | -0.20    | -0.44 |
| tcc_mediana    | 0.25     | -0.21 |
| vpd_mediana    | 0.01     | 0.06  |
| rsds_mediana   | -0.22    | 0.16  |
| indice_aridez  | -0.37    | -0.38 |
| indice_termico | -5.8E-04 | 0.47  |

Correlations matrix

| Variables      | CP 1     | CP 2  |
|----------------|----------|-------|
| etp_sumatoria  | -0.21    | -0.06 |
| prcp_sumatoria | -0.75    | -0.57 |
| tmax_mediana   | 0.89     | -0.16 |
| tmin_mediana   | 0.65     | -0.63 |
| tas_mediana    | 0.88     | -0.34 |
| hr_mediana     | -0.38    | -0.68 |
| tcc_mediana    | 0.47     | -0.32 |
| vpd_mediana    | 0.02     | 0.10  |
| rsds_mediana   | -0.43    | 0.25  |
| indice_aridez  | -0.71    | -0.58 |
| indice_termico | -1.1E-03 | 0.71  |

**Table S4.** Distribution of the IDEAM station's in the rice-producing areas in Colombia The data that was used corresponds to 214 meteorological stations for PCPT, 227 stations for ET, and 82, 84 and 79 stations for TMIN, TAVE and TMAX, respectively.

| Station's Code | Category | Station's name     | Municipality           | Department | Altitude (m) | Long X | Lat_Y | PCPT | TMIN | TAVE | TMAX | ET |
|----------------|----------|--------------------|------------------------|------------|--------------|--------|-------|------|------|------|------|----|
| 25020540       | PM       | Patio Bonito       | Nechi                  | Antioquia  | 53           | -74.71 | 8.03  | X    |      |      |      | X  |
| 25021480       | PM       | Esperanza La Radio | Nechi                  | Antioquia  | 45           | -74.79 | 8.03  | X    |      |      |      | X  |
| 27030040       | PM       | Guamo El           | Nechi                  | Antioquia  | 40           | -74.81 | 7.90  | X    |      |      |      | X  |
| 27045020       | CO       | Caseri             | Caucasia               | Antioquia  | 400          | -74.93 | 7.81  |      | X    | X    | X    | X  |
| 37050040       | PM       | Matezamuro         | Arauca                 | Arauca     | 150          | -70.85 | 6.97  | X    |      |      |      |    |
| 37055010       | SP       | Apto Arauca        | Arauca                 | Arauca     | 128          | -70.74 | 7.07  | X    | X    | X    | X    | X  |
| 23205020       | CO       | Col Cooperativo    | San Pablo              | Bolivar    | 165          | -73.93 | 7.48  | X    | X    | X    | X    | X  |
| 25020330       | PM       | Caimital           | San Jacinto del Cauca  | Bolivar    | 90           | -74.57 | 8.37  | X    |      |      |      | X  |
| 25020350       | PM       | Guaranda           | Achi                   | Bolivar    | 25           | -74.54 | 8.49  | X    |      |      |      | X  |
| 25020410       | PM       | Candelaria La      | San Jacinto del Cauca  | Bolivar    | 30           | -74.73 | 8.22  | X    |      |      |      | X  |
| 25020800       | PM       | Buenavista         | Achi                   | Bolivar    | 20           | -74.53 | 8.57  | X    |      |      |      | X  |
| 25020810       | PM       | Astilleros         | San Jacinto del Cauca  | Bolivar    | 40           | -74.61 | 8.29  | X    |      |      |      | X  |
| 35180010       | PM       | Pradera La         | Tauramena              | Casanare   | 180          | -72.67 | 4.94  | X    |      |      |      | X  |
| 35180040       | PM       | Poyata La          | Mani                   | Casanare   | 147          | -72.15 | 4.44  | X    |      |      |      | X  |
| 35180050       | PM       | Pto Texas          | Mani                   | Casanare   | 142          | -71.96 | 4.42  | X    |      |      |      | X  |
| 35190040       | PM       | Tamarindo          | Aguazul                | Casanare   | 290          | -72.54 | 5.01  | X    |      |      |      | X  |
| 35215010       | CP       | Apto Yopal         | Yopal                  | Casanare   | 325          | -72.39 | 5.32  | X    | X    | X    |      | X  |
| 35220040       | PM       | Macucuana          | Orocue                 | Casanare   | 117          | -71.53 | 4.91  | X    |      |      |      | X  |
| 35225020       | CO       | Modulos            | Orocue                 | Casanare   | 130          | -71.43 | 4.91  | X    | X    | X    | X    | X  |
| 35230010       | PM       | San Luis Palenque  | San Luis De Palenque   | Casanare   | 170          | -71.73 | 5.42  | X    |      |      |      | X  |
| 35095110       | CP       | Huerta La Grande   | Villanueva             | Casanare   | 255          | -72.92 | 4.66  |      |      |      |      | X  |
| 35230020       | PM       | Pore               | Pore                   | Casanare   | 300          | -71.99 | 5.72  |      |      |      |      | X  |
| 26020470       | PM       | Japio              | Santander de Quilichao | Cauca      | 1040         | -76.44 | 3.05  | X    |      |      |      |    |

| Station's Code | Category | Station's name   | Municipality    | Department | Altitude (m) | Long X | Lat_Y | PCPT | TMIN | TAVE | TMAX | ET |
|----------------|----------|------------------|-----------------|------------|--------------|--------|-------|------|------|------|------|----|
| 26040310       | PM       | Rio Palo         | Caloto          | Cauca      | 1100         | -76.38 | 3.07  | X    |      |      |      | X  |
| 26045010       | CO       | Ing Bengala      | Puerto Tejada   | Cauca      | 1000         | -76.42 | 3.26  | X    | X    | X    | X    | X  |
| 26065010       | CO       | Ing Cauca        | Miranda         | Cauca      | 1000         | -76.35 | 3.27  | X    | X    | X    | X    | X  |
| 23190110       | PM       | Libano El        | San Alberto     | Cesar      | 164          | -73.43 | 7.84  | X    |      |      |      | X  |
| 23190480       | PM       | Angeles Los      | Rio de Oro      | Cesar      | 228          | -73.51 | 8.10  | X    |      |      |      | X  |
| 23190500       | PM       | San Alberto      | San Alberto     | Cesar      | 134          | -73.39 | 7.76  | X    |      |      |      | X  |
| 23190580       | PM       | San Daniel Hda   | Rio de Oro      | Cesar      | 75           | -73.62 | 8.09  | X    |      |      |      | X  |
| 23190710       | PM       | Barranca Lebrija | Aguachica       | Cesar      | 50           | -73.72 | 8.01  | X    |      |      |      | X  |
| 23190810       | PM       | Planes Los       | San Alberto     | Cesar      | 650          | -73.32 | 7.81  | X    |      |      |      | X  |
| 23210120       | PM       | Vega La          | La Gloria       | Cesar      | 166          | -73.64 | 8.53  | X    |      |      |      | X  |
| 23210160       | PM       | Gamarra          | Gamarra         | Cesar      | 150          | -73.74 | 8.33  | X    |      |      |      | X  |
| 23215030       | CO       | Aguas Claras     | Aguachica       | Cesar      | 208          | -73.60 | 8.23  | X    | X    | X    | X    | X  |
| 25020090       | PM       | Tamalameque      | Tamalameque     | Cesar      | 20           | -73.82 | 8.86  | X    |      |      |      | X  |
| 25020250       | PM       | Curumani         | Curumani        | Cesar      | 100          | -73.55 | 9.20  | X    |      |      |      | X  |
| 25020660       | PM       | Zapatoza         | Curumani        | Cesar      | 90           | -73.75 | 9.01  | X    |      |      |      | X  |
| 25020690       | PM       | Poponte          | Curumani        | Cesar      | 500          | -73.41 | 9.42  | X    |      |      |      | X  |
| 25025250       | CO       | Chiriguana       | Chiriguana      | Cesar      | 40           | -73.59 | 9.36  | X    | X    | X    | X    | X  |
| 28020460       | PM       | Codazzi Dc       | Agustin Codazzi | Cesar      | 90           | -73.24 | 10.05 | X    |      |      |      | X  |
| 28020590       | PM       | Leticia          | San Diego       | Cesar      | 140          | -73.22 | 10.15 | X    |      |      |      | X  |
| 28025020       | CO       | Rincon El        | San Diego       | Cesar      | 350          | -73.13 | 10.27 | X    | X    | X    | X    | X  |
| 28025080       | CP       | Socomba          | Becerril        | Cesar      | 170          | -73.24 | 9.69  | X    | X    | X    | X    | X  |
| 28035010       | CO       | Villa Rosa       | Valledupar      | Cesar      | 70           | -73.55 | 10.19 | X    | X    | X    | X    | X  |
| 28035020       | CO       | Callao El        | Valledupar      | Cesar      | 110          | -73.32 | 10.36 | X    | X    | X    | X    | X  |
| 28035040       | CO       | Guaymaral        | Valledupar      | Cesar      | 50           | -73.65 | 9.91  | X    | X    | X    | X    | X  |
| 13030010       | PM       | Tierralta        | Tierralta       | Cordoba    | 100          | -76.05 | 8.18  | X    |      |      |      | X  |
| 13055030       | CO       | Galan            | Monteria        | Cordoba    | 30           | -75.97 | 8.66  | X    | X    | X    | X    | X  |

| Station's Code | Category | Station's name     | Municipality            | Department   | Altitude (m) | Long X | Lat_Y | PCPT | TMIN | TAVE | TMAX | ET |
|----------------|----------|--------------------|-------------------------|--------------|--------------|--------|-------|------|------|------|------|----|
| 13070050       | PM       | Cerete             | Cerete                  | Cordoba      | 20           | -75.79 | 8.89  | X    |      |      |      | X  |
| 13070070       | PM       | Boca de La Ceiba   | Monteria                | Cordoba      | 20           | -75.86 | 8.83  | X    |      |      |      |    |
| 13070100       | PM       | Sta Rosa           | San Carlos              | Cordoba      | 140          | -75.60 | 8.74  | X    |      |      |      | X  |
| 13070190       | PM       | Coroza 2           | San Carlos              | Cordoba      | 9            | -75.77 | 8.81  | X    |      |      |      | X  |
| 13075010       | CO       | Chima              | Chima                   | Cordoba      | 20           | -75.62 | 9.15  | X    | X    | X    | X    | X  |
| 13075020       | CO       | Salado El          | Cienaga de Oro          | Cordoba      | 40           | -75.58 | 8.91  | X    | X    | X    | X    | X  |
| 13075030       | AM       | Turipana           | Cerete                  | Cordoba      | 20           | -75.80 | 8.84  | X    | X    | X    | X    | X  |
| 13075050       | AM       | Univ de Cordoba    | Monteria                | Cordoba      | 15           | -75.86 | 8.79  | X    | X    | X    | X    | X  |
| 13085020       | CO       | Lorica             | Lorica                  | Cordoba      | 30           | -75.84 | 9.25  | X    | X    | X    | X    | X  |
| 13085030       | CO       | San Bernardo del V | San Bernardo del Viento | Cordoba      | 22           | -75.95 | 9.37  | X    | X    | X    | X    | X  |
| 13085040       | SS       | Apto Los Garzones  | Monteria                | Cordoba      | 20           | -75.83 | 8.83  | X    | X    | X    | X    | X  |
| 25015010       | CO       | Centro Alegre      | Planeta Rica            | Cordoba      | 170          | -75.63 | 8.18  | X    | X    | X    | X    | X  |
| 25020720       | PM       | Jobo El Tablon     | Sahagun                 | Cordoba      | 130          | -75.38 | 8.64  | X    |      |      |      | X  |
| 25020780       | PM       | Cecilia            | Ayapel                  | Cordoba      | 20           | -75.03 | 8.46  | X    |      |      |      | X  |
| 25025150       | CO       | Ayapel             | Ayapel                  | Cordoba      | 22           | -75.17 | 8.30  | X    | X    | X    | X    | X  |
| 25025160       | CO       | Cuba Hda           | Montelibano             | Cordoba      | 50           | -75.40 | 8.00  | X    | X    | X    | X    | X  |
| 25025170       | CO       | Colomboy           | Sahagun                 | Cordoba      | 125          | -75.50 | 8.74  | X    | X    | X    | X    | X  |
| 25025190       | CO       | Planeta Rica       | Planeta Rica            | Cordoba      | 90           | -75.58 | 8.40  | X    | X    | X    |      | X  |
| 21190210       | PM       | Nilo               | Nilo                    | Cundinamarca | 490          | -74.65 | 4.31  | X    |      |      |      | X  |
| 21195060       | CO       | Pandi              | Pandi                   | Cundinamarca | 950          | -74.49 | 4.19  | X    | X    | X    | X    | X  |
| 21230060       | PM       | Narino             | Narino                  | Cundinamarca | 289          | -74.83 | 4.40  | X    |      |      |      | X  |
| 35040010       | PM       | Retiro El          | Medina                  | Cundinamarca | 870          | -73.55 | 4.34  | X    |      |      |      | X  |
| 35050010       | PM       | Medina             | Medina                  | Cundinamarca | 480          | -73.35 | 4.51  | X    |      |      |      |    |
| 35050020       | PM       | San Juanito        | Medina                  | Cundinamarca | 426          | -73.40 | 4.42  | X    |      |      |      | X  |
| 35055010       | CO       | Japon El           | Paratebueno             | Cundinamarca | 280          | -73.30 | 4.38  | X    | X    | X    | X    | X  |
| 31015010       | CO       | Trueno El          | San Jose del Guaviare   | Guaviare     | 150          | -72.64 | 2.37  | X    | X    | X    | X    | X  |

| Station's Code | Category | Station's name     | Municipality          | Department | Altitude (m) | Long X | Lat_Y | PCPT | TMIN | TAVE | TMAX | ET |
|----------------|----------|--------------------|-----------------------|------------|--------------|--------|-------|------|------|------|------|----|
| 32105070       | CO       | San Jose Guaviare  | San Jose del Guaviare | Guaviare   | 165          | -72.65 | 2.55  |      | X    | X    | X    | X  |
| 21040040       | PM       | Pte Balseadero Rad | Agrado                | Huila      | 688          | -75.65 | 2.23  | X    |      |      |      | X  |
| 21045010       | CO       | Betulia La         | Agrado                | Huila      | 780          | -75.71 | 2.28  | X    | X    | X    | X    | X  |
| 21050150       | PM       | Paez Paicol Radio  | Paicol                | Huila      | 788          | -75.76 | 2.46  | X    |      |      |      | X  |
| 21050290       | PM       | Tesalia 2          | Tesalia               | Huila      | 825          | -75.73 | 2.49  | X    |      |      |      | X  |
| 21060070       | PM       | Gigante 2          | Gigante               | Huila      | 850          | -75.54 | 2.39  | X    |      |      |      | X  |
| 21060080       | PM       | Garzon             | Garzon                | Huila      | 990          | -75.61 | 2.19  | X    |      |      |      | X  |
| 21060090       | PM       | Hobo El            | Hobo                  | Huila      | 636          | -75.44 | 2.58  | X    |      |      |      | X  |
| 21060110       | PM       | Rioloro            | Gigante               | Huila      | 721          | -75.63 | 2.32  | X    |      |      |      | X  |
| 21080030       | PM       | Yaguara            | Yaguara               | Huila      | 600          | -75.53 | 2.67  | X    |      |      |      | X  |
| 21080070       | PM       | Sta Rosa Hda       | Yaguara               | Huila      | 650          | -75.58 | 2.64  | X    |      |      |      | X  |
| 21080130       | PG       | Totumo El Hda      | Iquira                | Huila      | 790          | -75.62 | 2.59  | X    |      |      |      | X  |
| 21090020       | PM       | Cucharo El         | Palermo               | Huila      | 620          | -75.40 | 2.86  | X    |      |      |      | X  |
| 21090040       | PM       | Papagayo Hda       | Palermo               | Huila      | 460          | -75.35 | 2.78  | X    |      |      |      | X  |
| 21090110       | PM       | Santa Barbara      | Palermo               | Huila      | 454          | -75.34 | 2.87  | X    |      |      |      | X  |
| 21095010       | CO       | Juncal El          | Palermo               | Huila      | 460          | -75.33 | 2.83  | X    | X    | X    | X    | X  |
| 21110040       | PM       | Hato Milagro       | Tello                 | Huila      | 548          | -75.17 | 3.08  | X    |      |      |      | X  |
| 21110070       | PM       | Baraya             | Baraya                | Huila      | 615          | -75.06 | 3.15  | X    |      |      |      | X  |
| 21110090       | PM       | Potosi             | Villavieja            | Huila      | 400          | -75.17 | 3.39  | X    |      |      |      | X  |
| 21110120       | PM       | Yeguera La         | Villavieja            | Huila      | 400          | -75.20 | 3.31  | X    |      |      |      | X  |
| 21110160       | PM       | Mesa Redonda       | Tello                 | Huila      | 500          | -75.20 | 3.12  | X    |      |      |      | X  |
| 21110180       | PM       | Hato Bogota        | Tello                 | Huila      | 591          | -75.16 | 3.04  | X    |      |      |      | X  |
| 21110290       | PM       | Victoria La        | Villavieja            | Huila      | 400          | -75.17 | 3.35  | X    |      |      |      | X  |
| 21110330       | PM       | Polonia            | Villavieja            | Huila      | 429          | -75.22 | 3.19  | X    |      |      |      | X  |
| 21110440       | PM       | Guadual El         | Rivera                | Huila      | 735          | -75.24 | 2.80  | X    |      |      |      | X  |
| 21115020       | SS       | Apto Benito Salas  | Neiva                 | Huila      | 439          | -75.29 | 2.95  | X    | X    | X    | X    | X  |

| Station's Code | Category | Station's name   | Municipality  | Department | Altitude (m) | Long X | Lat_Y | PCPT | TMIN | TAVE | TMAX | ET |
|----------------|----------|------------------|---------------|------------|--------------|--------|-------|------|------|------|------|----|
| 21115060       | CO       | San Jose         | Villavieja    | Huila      | 400          | -75.18 | 3.33  | X    | X    | X    | X    | X  |
| 21115160       | AM       | Manila La Hda    | Baraya        | Huila      | 600          | -75.08 | 3.13  | X    | X    | X    | X    | X  |
| 21120090       | PM       | Totumo El        | Palermo       | Huila      | 700          | -75.49 | 2.87  | X    |      |      |      | X  |
| 21120130       | PM       | Rionegro Hda     | Palermo       | Huila      | 560          | -75.43 | 2.91  | X    |      |      |      | X  |
| 21130050       | PM       | Perez Hda        | Aipe          | Huila      | 450          | -75.26 | 3.24  | X    |      |      |      | X  |
| 21140100       | PM       | San Juanito      | Villavieja    | Huila      | 368          | -75.11 | 3.42  | X    |      |      |      | X  |
| 21140110       | PM       | Tomo El          | Villavieja    | Huila      | 444          | -75.10 | 3.35  | X    |      |      |      | X  |
| 21145040       | AM       | San Alfonso      | Villavieja    | Huila      | 440          | -75.11 | 3.37  | X    | X    | X    | X    | X  |
| 21105040       | CO       | Potosi Hda       | Campoalegre   | Huila      | 680          | -75.30 | 2.70  |      | X    | X    |      | X  |
| 21105060       | CP       | Hidrobetania     | Campoalegre   | Huila      | 500          | -75.43 | 2.71  |      |      |      |      | X  |
| 15065040       | CO       | Paulina La       | Fonseca       | La Guajira | 170          | -72.83 | 10.90 | X    | X    | X    | X    | X  |
| 25025090       | SP       | Apto Las Flores  | El Banco      | Magdalena  | 34           | -73.97 | 9.05  | X    | X    | X    | X    | X  |
| 29060030       | PM       | Bongo El         | El Reten      | Magdalena  | 20           | -74.38 | 10.65 | X    |      |      |      | X  |
| 29060040       | PM       | Fundacion        | Fundacion     | Magdalena  | 40           | -74.18 | 10.52 | X    |      |      |      | X  |
| 29060100       | PM       | Sta Rosa de Lima | Fundacion     | Magdalena  | 75           | -74.11 | 10.40 | X    |      |      |      | X  |
| 29060150       | PM       | Destino El       | El Reten      | Magdalena  | 20           | -74.22 | 10.57 | X    |      |      |      | X  |
| 29060180       | PM       | Esperanza La     | Puebloviejo   | Magdalena  | 25           | -74.31 | 10.74 | X    |      |      |      | X  |
| 29060190       | PM       | Florida La       | El Reten      | Magdalena  | 26           | -74.26 | 10.61 | X    |      |      |      | X  |
| 29060200       | PM       | Maria La         | Aracataca     | Magdalena  | 30           | -74.19 | 10.54 | X    |      |      |      | X  |
| 29060270       | PM       | Palo Alto        | Puebloviejo   | Magdalena  | 25           | -74.27 | 10.72 | X    |      |      |      | X  |
| 29060560       | PM       | Dona Maria       | Fundacion     | Magdalena  | 50           | -74.18 | 10.38 | X    |      |      |      | X  |
| 29065020       | CO       | Padelma          | Zona Bananera | Magdalena  | 20           | -74.20 | 10.72 | X    | X    | X    | X    | X  |
| 29065030       | CO       | Prado Sevilla    | Zona Bananera | Magdalena  | 18           | -74.16 | 10.76 | X    | X    | X    | X    | X  |
| 32060020       | PM       | Mesa de Yamanes  | El Castillo   | Meta       | 600          | -73.90 | 3.53  | X    |      |      |      | X  |
| 32070010       | PM       | Campo Alegre     | Vistahermosa  | Meta       | 260          | -73.75 | 3.20  | X    |      |      |      | X  |
| 32070020       | PG       | Cano Blanco      | Fuente de Oro | Meta       | 240          | -73.52 | 3.25  | X    |      |      |      | X  |

| Station's Code | Category | Station's name     | Municipality      | Department | Altitude (m) | Long X | Lat_Y | PCPT | TMIN | TAVE | TMAX | ET |
|----------------|----------|--------------------|-------------------|------------|--------------|--------|-------|------|------|------|------|----|
| 32070040       | PM       | Pinalito           | Vistahermosa      | Meta       | 245          | -73.63 | 2.98  | X    |      |      |      |    |
| 32070060       | PM       | Fuente de Oro      | Fuente de Oro     | Meta       | 300          | -73.63 | 3.47  | X    |      |      |      |    |
| 32070080       | PM       | Tierra Grata       | Puerto Lleras     | Meta       | 191          | -73.23 | 3.09  | X    |      |      |      |    |
| 32070100       | PG       | San Juan de Arama  | San Juan de Arama | Meta       | 410          | -73.89 | 3.38  | X    |      |      |      | X  |
| 32075030       | CO       | Vista Hermosa      | Vistahermosa      | Meta       | 325          | -73.75 | 3.12  | X    | X    | X    | X    | X  |
| 32075040       | CO       | Holanda La         | Granada           | Meta       | 360          | -73.72 | 3.52  | X    | X    | X    | X    | X  |
| 32075050       | CO       | Mesetas            | Mesetas           | Meta       | 620          | -74.04 | 3.38  | X    | X    | X    | X    | X  |
| 32080010       | PM       | Pto Rico           | Puerto Rico       | Meta       | 230          | -73.21 | 2.94  | X    |      |      |      | X  |
| 35010010       | PM       | Pto Lopez          | Puerto Lopez      | Meta       | 182          | -72.94 | 4.11  | X    |      |      |      | X  |
| 35010020       | PM       | Acacias            | Acacias           | Meta       | 525          | -73.77 | 4.00  | X    |      |      |      | X  |
| 35010040       | PM       | Cano Hondo         | Guamal            | Meta       | 800          | -73.82 | 3.92  | X    |      |      |      | X  |
| 35010060       | PM       | Toro El            | Castilla La Nueva | Meta       | 230          | -73.40 | 3.79  | X    |      |      |      | X  |
| 35010070       | PM       | Guamal             | Guamal            | Meta       | 525          | -73.76 | 3.88  | X    |      |      |      | X  |
| 35010080       | PM       | Nare               | Puerto Lopez      | Meta       | 200          | -73.15 | 3.79  | X    |      |      |      | X  |
| 35010090       | PM       | San Martin         | San Martin        | Meta       | 420          | -73.70 | 3.75  | X    |      |      |      | X  |
| 35020060       | PM       | Pompeya            | Villavicencio     | Meta       | 260          | -73.37 | 4.04  | X    |      |      |      | X  |
| 35025020       | AM       | Libertad La        | Villavicencio     | Meta       | 336          | -73.47 | 4.06  | X    | X    | X    | X    | X  |
| 35030050       | PM       | Ojo De Agua        | Villavicencio     | Meta       | 300          | -73.45 | 4.09  | X    |      |      |      | X  |
| 35035020       | SP       | Apto Vanguardia    | Villavicencio     | Meta       | 423          | -73.62 | 4.16  | X    | X    | X    | X    | X  |
| 35045020       | CO       | Cabana La Hda      | Cumaral           | Meta       | 305          | -73.36 | 4.30  | X    | X    | X    | X    | X  |
| 35100020       | PM       | Cabuyaro           | Cabuyaro          | Meta       | 180          | -72.79 | 4.28  | X    |      |      |      | X  |
| 35120010       | PM       | Pto Gaitan         | Puerto Gaitan     | Meta       | 150          | -72.08 | 4.31  | X    |      |      |      | X  |
| 35125010       | CO       | Margaritas Las Hda | Puerto Lopez      | Meta       | 150          | -72.16 | 4.34  | X    | X    | X    | X    | X  |
| 35180030       | PM       | Fundo Nuevo Humapo | Puerto Lopez      | Meta       | 155          | -72.39 | 4.33  | X    |      |      |      | X  |
| 32075080       | CO       | Pto Lleras         | Puerto Lleras     | Meta       | 245          | -73.37 | 3.27  |      | X    | X    | X    | X  |
| 35015050       | CO       | Barbascal          | San Martin        | Meta       | 250          | -73.35 | 3.63  |      | X    | X    | X    | X  |

| Station's Code | Category | Station's name     | Municipality      | Department   | Altitude (m) | Long X | Lat_Y | PCPT | TMIN | TAVE | TMAX | ET |
|----------------|----------|--------------------|-------------------|--------------|--------------|--------|-------|------|------|------|------|----|
| 35035070       | CP       | Unillanos          | Villavicencio     | Meta         | 340          | -73.58 | 4.08  |      | X    | X    | X    | X  |
| 35105050       | CO       | Guaicaramo         | Barranca de Upia  | Meta         | 190          | -72.95 | 4.47  |      |      |      |      | X  |
| 32070110       | PG       | Aguas Claras       | Granada           | Meta         | 520          | -73.86 | 3.47  |      |      |      |      | X  |
| 16010010       | PM       | Villa del Rosario  | Villa del Rosario | N. Santander | 431          | -72.48 | 7.82  | X    |      |      |      | X  |
| 16010020       | PM       | Donjuana La 2      | Bochalema         | N. Santander | 770          | -72.60 | 7.70  | X    |      |      |      | X  |
| 16010040       | PM       | Sta Rita           | Cucuta            | N. Santander | 72           | -72.37 | 8.19  | X    |      |      |      | X  |
| 16010060       | PM       | Jarra La           | Cucuta            | N. Santander | 87           | -72.43 | 8.20  | X    |      |      |      | X  |
| 16015010       | SP       | Apto Camilo Daza   | Cucuta            | N. Santander | 250          | -72.51 | 7.93  | X    | X    | X    | X    | X  |
| 16020030       | PM       | Santiago Caimito   | Santiago          | N. Santander | 411          | -72.72 | 7.86  | X    |      |      |      | X  |
| 16020180       | PM       | Cerro Pelao        | Cucuta            | N. Santander | 300          | -72.50 | 8.01  | X    |      |      |      | X  |
| 16020190       | PM       | Cornejo            | San Cayetano      | N. Santander | 250          | -72.63 | 7.90  | X    |      |      |      | X  |
| 16020320       | PM       | Aguablanca         | Cucuta            | N. Santander | 250          | -72.48 | 8.04  | X    |      |      |      | X  |
| 16020340       | PM       | Planadas           | Cucuta            | N. Santander | 100          | -72.44 | 8.22  | X    |      |      |      | X  |
| 16025010       | CP       | Carmen de Tonchala | Cucuta            | N. Santander | 285          | -72.57 | 7.85  | X    | X    | X    | X    | X  |
| 16025030       | CP       | Salazar            | Salazar           | N. Santander | 860          | -72.83 | 7.78  | X    | X    | X    | X    | X  |
| 16025040       | CP       | Cinera-Villa Olga  | Cucuta            | N. Santander | 100          | -72.47 | 8.17  | X    | X    | X    | X    | X  |
| 16030030       | PM       | Campo Tres         | Tibu              | N. Santander | 40           | -72.70 | 8.52  | X    |      |      |      | X  |
| 16030060       | PM       | San Gil            | Sardinata         | N. Santander | 480          | -72.86 | 8.22  | X    |      |      |      | X  |
| 16035010       | CO       | Tibu               | Tibu              | N. Santander | 50           | -72.73 | 8.64  | X    | X    | X    | X    | X  |
| 16035020       | CO       | Petrolea           | Tibu              | N. Santander | 62           | -72.58 | 8.47  | X    | X    | X    | X    | X  |
| 16035030       | CO       | Sardinata          | Sardinata         | N. Santander | 320          | -72.80 | 8.08  | X    | X    | X    | X    | X  |
| 23180040       | PM       | Porvenir El        | Sabana de Torres  | Santander    | 154          | -73.48 | 7.45  | X    |      |      |      | X  |
| 23180050       | PM       | Establo El         | Sabana de Torres  | Santander    | 98           | -73.60 | 7.54  | X    |      |      |      | X  |
| 23180070       | PM       | Sabana de Torres   | Sabana de Torres  | Santander    | 176          | -73.49 | 7.39  | X    |      |      |      | X  |
| 23180080       | PM       | Eloy Valenzuela    | Sabana de Torres  | Santander    | 132          | -73.68 | 7.49  | X    |      |      |      | X  |
| 23185010       | CP       | Villa Leiva        | Sabana de Torres  | Santander    | 328          | -73.54 | 7.46  | X    | X    | X    | X    | X  |

| Station's Code | Category | Station's name     | Municipality     | Department | Altitude (m) | Long X | Lat_Y | PCPT | TMIN | TAVE | TMAX | ET |
|----------------|----------|--------------------|------------------|------------|--------------|--------|-------|------|------|------|------|----|
| 23190460       | PM       | Papayal            | Rionegro         | Santander  | 100          | -73.65 | 7.62  | X    |      |      |      | X  |
| 23190560       | PM       | San Rafael         | Sabana de Torres | Santander  | 96           | -73.56 | 7.57  | X    |      |      |      | X  |
| 24065010       | CO       | Brisas Las Hda     | Puerto Wilches   | Santander  | 138          | -73.79 | 7.25  | X    | X    | X    | X    | X  |
| 23190320       | PM       | Provincia          | Sabana de Torres | Santander  | 172          | -73.44 | 7.40  |      |      |      |      | X  |
| 23190210       | PM       | Magara             | Sabana de Torres | Santander  | 80           | -73.68 | 7.59  |      |      |      |      | X  |
| 25020740       | PM       | Eureka Hda         | San Marcos       | Sucre      | 20           | -75.09 | 8.58  | X    |      |      |      | X  |
| 25020820       | PM       | Zapata             | Majagual         | Sucre      | 50           | -74.70 | 8.60  | X    |      |      |      | X  |
| 25020940       | PM       | Villanueva         | Guaranda         | Sucre      | 40           | -74.74 | 8.33  | X    |      |      |      | X  |
| 25020980       | PM       | Caimito            | Caimito          | Sucre      | 20           | -75.12 | 8.79  | X    |      |      |      | X  |
| 25021470       | PM       | Torno El Hda       | San Marcos       | Sucre      | 60           | -75.09 | 8.58  | X    |      |      |      | X  |
| 25021660       | PM       | Mirasol            | San Marcos       | Sucre      | 30           | -75.26 | 8.60  |      |      |      |      | X  |
| 21130180       | PM       | Altamira Dc Hda    | Natagaima        | Tolima     | 500          | -75.15 | 3.45  | X    |      |      |      | X  |
| 21135020       | CO       | Jabalcon           | Saldana          | Tolima     | 425          | -75.02 | 3.86  | X    | X    | X    | X    | X  |
| 21135030       | CP       | Anchique           | Natagaima        | Tolima     | 415          | -75.11 | 3.57  | X    | X    | X    | X    | X  |
| 21135040       | CO       | Media Luna         | Coyaima          | Tolima     | 485          | -75.12 | 3.77  | X    | X    | X    | X    | X  |
| 21150030       | PM       | Tinajas            | Natagaima        | Tolima     | 290          | -75.06 | 3.57  | X    |      |      |      | X  |
| 21160040       | PM       | Aco                | Prado            | Tolima     | 360          | -74.81 | 3.75  | X    |      |      |      | X  |
| 21160050       | PM       | Pinalito Hda       | Prado            | Tolima     | 800          | -74.84 | 3.67  | X    |      |      |      | X  |
| 21160080       | PM       | Boqueron           | Prado            | Tolima     | 322          | -74.90 | 3.75  | X    |      |      |      | X  |
| 21165030       | CO       | Lozania            | Purificacion     | Tolima     | 400          | -74.77 | 3.90  | X    | X    | X    | X    | X  |
| 21170040       | PM       | Mesas Las          | Suarez           | Tolima     | 860          | -74.82 | 3.91  | X    |      |      |      | X  |
| 21180040       | PM       | Rovira 2           | Rovira           | Tolima     | 950          | -75.24 | 4.24  | X    |      |      |      | X  |
| 21180120       | PM       | Lorena La Hda      | San Luis         | Tolima     | 450          | -75.11 | 4.03  | X    |      |      |      | X  |
| 21180160       | PM       | Suarez             | Guamo            | Tolima     | 300          | -74.84 | 4.06  | X    |      |      |      | X  |
| 21185020       | AM       | Nataima            | Espinal          | Tolima     | 431          | -74.96 | 4.19  | X    | X    | X    | X    | X  |
| 21185040       | CO       | Apto Santiago Vila | Flandes          | Tolima     | 286          | -74.80 | 4.28  | X    | X    | X    | X    | X  |

| Station's Code | Category | Station's name     | Municipality               | Department      | Altitude (m) | Long X | Lat_Y | PCPT | TMIN | TAVE | TMAX | ET |
|----------------|----------|--------------------|----------------------------|-----------------|--------------|--------|-------|------|------|------|------|----|
| 21190300       | PM       | Salero El          | Melgar                     | Tolima          | 650          | -74.61 | 4.24  | X    |      |      |      | X  |
| 21215080       | CO       | Chicoral           | Espinal                    | Tolima          | 475          | -75.00 | 4.23  | X    | X    | X    | X    | X  |
| 21215140       | ME       | Cementos Diamante  | Ibague                     | Tolima          | 780          | -75.08 | 4.33  | X    | X    | X    | X    | X  |
| 21250070       | PG       | Sierra La          | Lerida                     | Tolima          | 477          | -74.94 | 4.80  | X    |      |      |      | X  |
| 21250430       | PM       | Campamento Ambalem | Ambalema                   | Tolima          | 241          | -74.77 | 4.78  | X    |      |      |      | X  |
| 21250460       | PM       | Venadillo          | Venadillo                  | Tolima          | 430          | -74.92 | 4.66  | X    |      |      |      | X  |
| 21255140       | CP       | Quinta La          | Lerida                     | Tolima          | 500          | -74.92 | 4.82  | X    | X    | X    | X    | X  |
| 22045010       | CO       | Demostracion Gja   | Chaparral                  | Tolima          | 1040         | -75.50 | 3.72  | X    | X    | X    | X    | X  |
| 22050090       | PM       | Molino Murra       | Saldana                    | Tolima          | 410          | -75.02 | 3.92  | X    |      |      |      | X  |
| 22055030       | CO       | Sta Helena         | Purificacion               | Tolima          | 300          | -74.90 | 3.99  | X    | X    | X    | X    | X  |
| 22060090       | PM       | Olaya Herrera      | Ortega                     | Tolima          | 475          | -75.33 | 3.82  | X    |      |      |      | X  |
| 23015040       | SS       | Apto Mariquita     | San Sebastian de Mariquita | Tolima          | 475          | -74.89 | 5.21  | X    | X    | X    | X    |    |
| 21165010       | CO       | Pst de Monta       | Prado                      | Tolima          | 349          | -74.92 | 3.79  |      | X    | X    | X    | X  |
| 21255150       | CP       | Garcia Hda         | Lerida                     | Tolima          | 350          | -74.89 | 4.86  |      | X    | X    | X    | X  |
| 21195080       | CO       | Base Aerea Melgar  | Melgar                     | Tolima          | 319          | -74.64 | 4.21  |      |      | X    |      | X  |
| 21240080       | PM       | Alvarado           | Alvarado                   | Tolima          | 439          | -74.95 | 4.57  |      |      |      |      | X  |
| 21210200       | PM       | Buenos Aires       | Ibague                     | Tolima          | 750          | -75.07 | 4.34  |      |      |      |      | X  |
| 21220050       | PM       | Aceituno El        | Ibague                     | Tolima          | 680          | -75.05 | 4.35  |      |      |      |      | X  |
| 21170030       | PM       | Maporita La Dc Hda | Suarez                     | Tolima          | 280          | -74.86 | 3.95  |      |      |      |      | X  |
| 26055070       | CP       | Univ del Valle     | Cali                       | Valle del Cauca | 985          | -76.53 | 3.38  | X    | X    | X    | X    | X  |
| 26075010       | AM       | Palmira Ica        | Palmira                    | Valle del Cauca | 1050         | -76.32 | 3.51  | X    | X    | X    | X    | X  |
| 26075040       | SP       | Apto A Bonilla     | Palmira                    | Valle del Cauca | 961          | -76.39 | 3.53  | X    | X    | X    | X    | X  |
| 26075050       | CO       | Ing Manuelita Porv | Palmira                    | Valle del Cauca | 1058         | -76.28 | 3.57  | X    |      |      |      | X  |
| 26075080       | AM       | Cenicana           | Florida                    | Valle del Cauca | 1013         | -76.30 | 3.36  | X    | X    | X    | X    | X  |
| 26080070       | PM       | Vijes              | Vijes                      | Valle del Cauca | 987          | -76.43 | 3.70  | X    |      |      |      | X  |
| 26080290       | PM       | Mediacanoa-Alertas | Yotoco                     | Valle del Cauca | 944          | -76.35 | 3.89  | X    |      |      |      | X  |

| Station's Code | Category | Station's name | Municipality        | Department      | Altitude (m) | Long X | Lat_Y | PCPT       | TMIN      | TAVE      | TMAX      | ET         |
|----------------|----------|----------------|---------------------|-----------------|--------------|--------|-------|------------|-----------|-----------|-----------|------------|
| 26085120       | SS       | Base Aerea MFS | Cali                | Valle del Cauca | 954          | -76.50 | 3.46  | X          |           | X         |           | X          |
| 26095230       | AM       | Vinculo El     | Guadalajara de Buga | Valle del Cauca | 979          | -76.30 | 3.84  | X          | X         | X         | X         | X          |
| 26105160       | SP       | Apto Farfan    | Tulua               | Valle del Cauca | 955          | -76.22 | 4.09  | X          | X         | X         | X         | X          |
| 34015010       | SP       | Gaviotas Las   | Cumaribo            | Vichada         | 171          | -70.93 | 4.55  | X          | X         | X         | X         | X          |
| <b>TOTAL</b>   |          |                |                     |                 |              |        |       | <b>214</b> | <b>82</b> | <b>84</b> | <b>79</b> | <b>227</b> |
